# Supplementary material for: Genome-Wide Survey and Expression Analysis of Chlamydomonas reinhardtii U-box E3 Ubiquitin Ligases (CrPUBs) Reveal a Functional Lipid Metabolism Module
Source: PubMed Central journal article supplement (PMC4378952; doi:10.1371/journal.pone.0122600), 2015-03-30
Supplement: pone.0122600.s001.pdf [file pone.0122600.s001.pdf]

**S1 Table**

| Gene name | Primer sequences            | Gene name | Primer sequences            |
|-----------|-----------------------------|-----------|-----------------------------|
| CrPUB1    | F:5'-ACGTTGTCCGGGCGCATCA-3' | CrPUB16   | F:5'-G TTCCTGTGGGACTTGCC-3' |
|           | R:5'-AGCGCAGGTTGTGGTTGG-3'  |           | R:5'-CGCCTCGTCTGCTTTGTT-3'  |
| CrPUB2    | F:5'-CAACCGCACTCGCCTGTA-3'  | CrPUB17   | F:5'-CTTCCGCACAAGCAGCAA-3'  |
|           | R:5'-GGCTCGCTCGTATGTGAA-3'  |           | R:5'-ACCCGCCAGTAGCGATGA-3'  |
| CrPUB3    | F:5'-GAGGAGCTGGAGCCCGAT-3'  | CrPUB18   | F:5'-GCTCTGACGTGGCCTTTG-3'  |
|           | R:5'-GCAGCCGCAACAGGAACA-3'  |           | R:5'-ATGGACGGCATGAACCCT-3'  |
| CrPUB4    | F:5'-ACTCAACCCGTCCCATCA-3'  | CrPUB19   | F:5'-CAAGGTCGTGGTGAGTTA-3'  |
|           | R:5'-AGCCGCAACAGGAACAGC-3'  |           | R:5'-GCGAAATACTGGCGTAAA-3'  |
| CrPUB5    | F:5'-GACGGCGGAGGAGATGGT-3'  | CrPUB20   | F:5'-GCCCTTCTCCCTTCCCTC-3'  |
|           | R:5'-CTTTGAGGGCGTTGTTGG-3'  |           | R:5'-ATGGCGGCTCGCTCGTAG-3'  |
| CrPUB6    | F:5'-TGCCCATCACCCAGGAG-3'   | CrPUB21   | F:5'-CGATGAAGCGTCACCAGA-3'  |
|           | R:5'-CGTCCCACCGGTTATTC-3'   |           | R:5'-CACGGAGCTGAAGGAGGA-3'  |
| CrPUB7    | F:5'-TCCCTCGCTACCCACAGT-3'  | CrPUB22   | F:5'-CTCAAGCCCGCCAACATC-3'  |
|           | R:5'-GGCCTCCTCCTCCGTTT-3'   |           | R:5'-CCGACTCCACCACAGACA-3'  |
| CrPUB8    | F:5'-TGGACGAGCAGGTGACGA-3'  | CrPUB23   | F:5'-CTGGGCTTGGGTGGTGGA-3'  |
|           | R:5'-CCAGCAGGTTCCCAAACG-3'  |           | R:5'-GCGGTGTTGGCAGTAGCA-3'  |
| CrPUB9    | F:5'-GGGTCGTGCAGTTGGTCT-3'  | CrPUB24   | F:5'-GCAGCAATGGTGTGCTCG-3'  |
|           | R:5'-CCCACAGTGATTGCGAGA-3'  |           | R:5'-CCGCTGGGCAATCTTCTC-3'  |
| CrPUB10   | F:5'-CGCCTGGTGGCTGTCTTC-3'  | CrPUB25   | F:5'-GCGCATCAGCATCCAAGC-3'  |
|           | R:5'-CCTTCGCCGTCATCATCG-3'  |           | R:5'-TTCCGTAACCGCGAACCC-3'  |
| CrPUB11   | F:5'-CCATCCTTAGCACCATCA-3'  | CrPUB26   | F:5'-TCGCCTACGACACCACCT-3'  |
|           | R:5'-TCCGTCCCTTCCGTTTCC-3'  |           | R:5'-CAGCCCAGTCACCAACAC-3'  |
| CrPUB12   | F:5'-CAAGTCAACACCGGAAA-3'   | CrPUB27   | F:5'-GGACGCCGATGTGGAAGA-3'  |
|           | R:5'-TGCCACAATGAGGTTTCG-3'  |           | R:5'-TGTGGCCGCCAGAATCAC-3'  |
| CrPUB13   | F:5'-TCCACCCGCACATTCACA-3'  | CrPUB28   | F:5'-GCCGACTGCGAGTGGATT-3'  |
|           | R:5'-TGCTTCCCACAGCCACAG-3'  |           | R:5'-GCCGGTGCAGATGATGAA-3'  |
| CrPUB14   | F:5'-CCTGCCGCCCGAGATGCT-3'  | CrPUB29   | F:5'-GGGATGCTGGATATTGGC-3'  |
|           | R:5'-CGCCGTGGTGTGTTGATGC-3' |           | R:5'-CACCTCCTCCGGCGACAC-3'  |
| CrPUB15   | F:5'-TGCCCAATCACGCAGGAC-3'  | CrPUB30   | F:5'-AGTGCGGTTTGGTCT-3'     |
|           | R:5'-AATCCGCTGCCGCTGGTA-3'  |           | R:5'-CTGTTGGCGTGCTTGA-3'    |
