# Supplementary material for: Genome-Wide Survey and Expression Analysis of Chlamydomonas reinhardtii U-box E3 Ubiquitin Ligases (CrPUBs) Reveal a Functional Lipid Metabolism Module
Source: PubMed Central journal article supplement (PMC4378952; doi:10.1371/journal.pone.0122600), 2015-03-30
Supplement: pone.0122600.s002.pdf [file pone.0122600.s002.pdf]

**S2 Table**

| A         |                               |        |                     |      |              |
|-----------|-------------------------------|--------|---------------------|------|--------------|
| Gene name | Primer sequences              | Length | T <sub>m</sub> (°C) | GC%  | Product size |
| CrPUB5    | F:5'-CGAGGAGGACGACGACGACA-3'  | 20bp   | 64.0                | 65.0 | 491bp        |
|           | R:5'-TGAGCGGGCACAGGAAGCAG-3'  | 20bp   | 66.7                | 65.0 |              |
| CrPUB11   | F:5'-CGGTCATCAGCACCCCTCAAC-3' | 20bp   | 60.8                | 60.0 | 436bp        |
|           | R:5'-ATCTCCTCGTCCTCCGCCTC-3'  | 20bp   | 62.8                | 65.0 |              |
| CrPUB14   | F:5'-TTCCTGCCGCCCGAGATGCT-3'  | 20bp   | 69.5                | 65.0 | 306bp        |
|           | R:5'-GCCGCCGTGGTGTGTTGATGC-3' | 20bp   | 68.8                | 65.0 |              |
| CrPUB23   | F:5'-GAGCGAGCTGTGCAGGGTTG-3'  | 20bp   | 63.9                | 65.0 | 493bp        |
|           | R:5'-CGAAGCGTGCAGGTCGGTAG-3'  | 20bp   | 64.0                | 65.0 |              |
| CrPUB28   | F:5'-AGCCGACTGCGAGTGGATTG-3'  | 20bp   | 63.3                | 60.0 | 405bp        |
|           | R:5'-GCGTTGCACTGTGCCTGACC-3'  | 20bp   | 64.5                | 65.0 |              |
| B         |                               |        |                     |      |              |
| Gene name | Primer sequences              | Length | T <sub>m</sub> (°C) | GC%  | Product size |
| CrPUB5    | F:5'-CGCCGTGTCCAACACCTTTG-3'  | 20bp   | 64.4                | 60.0 | 328bp        |
|           | R:5'-ACCCGTGTCAGCGAACTTGC-3'  | 20bp   | 63.2                | 60.0 |              |
| CrPUB11   | F:5'-CCGTGAAGATGGTCGTGGAG-3'  | 20bp   | 60.9                | 60.0 | 422bp        |
|           | R:5'-CATGTGGCCCTTCGTGGTCT-3'  | 20bp   | 62.8                | 60.0 |              |
| CrPUB14   | F:5'-CAAGAGGGCGTCGAAGGTGG-3'  | 20bp   | 65.1                | 65.0 | 441bp        |
|           | R:5'-GCGCAGGTTGTCGTTGTGGA-3'  | 20bp   | 64.9                | 60.0 |              |
| CrPUB23   | F:5'-GCTGCCTGAGGAGCTGGTGA -3' | 20bp   | 63.4                | 65.0 | 436bp        |
|           | R:5'-ACTGCCGCTGAAACGGTGGG -3' | 20bp   | 67.6                | 65.0 |              |
| CrPUB28   | F:5'-CTTCAGCGACGCCAAGGACG -3' | 20bp   | 66.2                | 65.0 | 376bp        |
|           | R:5'-GCCAATCAGCTCGGCACAGG-3'  | 20bp   | 66.0                | 65.0 |              |
